# Supplementary material for: Proteasome inhibitor bortezomib stabilizes and activates p53 in hematopoietic stem/progenitors and double-negative T cells in vivo
Source: PubMed Central journal article supplement — Proc Natl Acad Sci U S A. 2023 Mar 20;120(13):e2219978120. doi: 10.1073/pnas.2219978120 (PMC10068759; doi:10.1073/pnas.2219978120), 2023-03-20
Supplement: pnas.2219978120.sapp.pdf [file pnas.2219978120.sapp.pdf]

## Supporting Information for

Proteasome inhibitor bortezomib stabilizes and activates p53 in hematopoietic stem/progenitors and double negative T cells *in vivo*

Yuezhen Xue<sup>1</sup>, Boris San Luis<sup>1</sup>, Regine J. Dress<sup>2</sup>, Katzrin Binte Ahmad Murad<sup>1</sup>, Florent Ginhoux<sup>2-4</sup>, Nick Barker<sup>1,5\*</sup>, David Lane<sup>1,6\*</sup>

\*Nick Barker

**Email:** [nicholas\\_barker@imcb.a-star.edu.sg](mailto:nicholas_barker@imcb.a-star.edu.sg)

\*David P. Lane

**Email:** [dplane@imcb.a-star.edu.sg](mailto:dplane@imcb.a-star.edu.sg)

**This PDF file includes:**

*SI Appendix*, Figures S1 to S5

*SI Appendix*, Tables S1 to S7

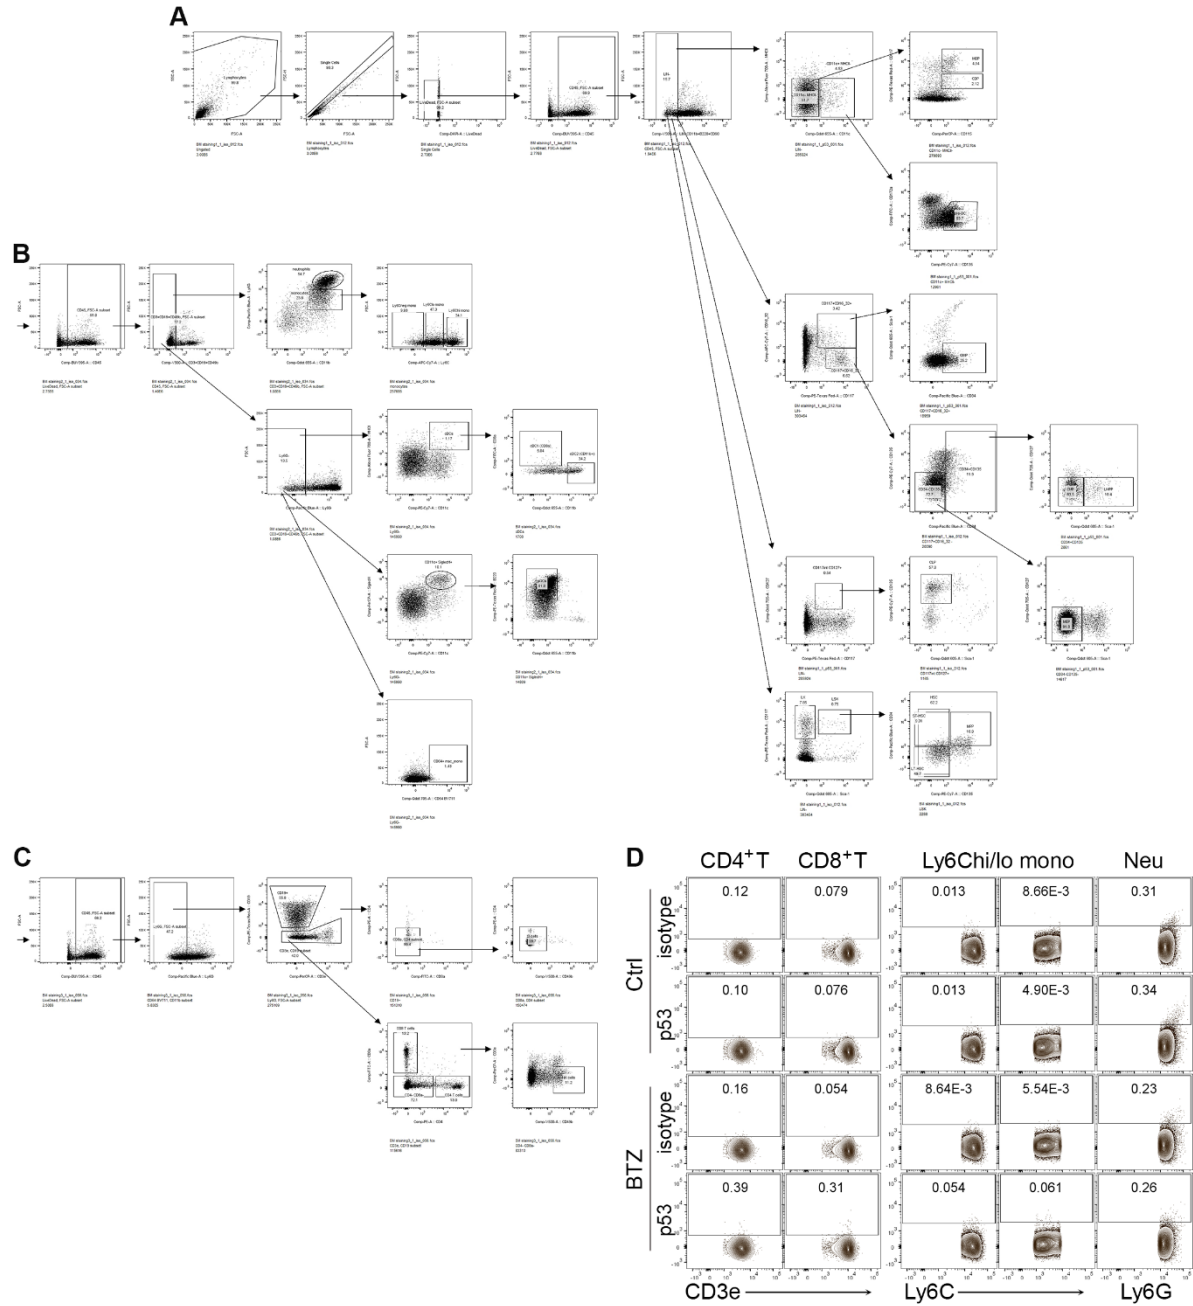

**SI Appendix, Fig. S1. Gating strategies.** (A) Gating strategies for HSPCs of bone marrow:

HSC (Lin<sup>-</sup>Sca-1<sup>+</sup>CD117<sup>+</sup>CD135<sup>-</sup>), MPP (Lin<sup>-</sup>Sca-1<sup>+</sup>CD117<sup>+</sup>CD34<sup>+</sup>CD135<sup>+</sup>), LMPP (Lin<sup>-</sup>Sca-1<sup>+</sup>CD117<sup>+</sup>CD16/32<sup>-</sup>CD34<sup>+</sup>CD127<sup>-</sup>), CLP (Lin<sup>-</sup>Sca-1<sup>lo</sup>CD117<sup>int</sup>CD127<sup>+</sup>CD34<sup>+</sup>CD135<sup>+</sup>), GMP (Lin<sup>-</sup>Sca-1<sup>-</sup>CD117<sup>+</sup>CD16/32<sup>+</sup>CD34<sup>+</sup>), CMP (Lin<sup>-</sup>Sca-1<sup>-</sup>CD117<sup>+</sup>CD16/32<sup>-</sup>CD34<sup>+</sup>CD127<sup>-</sup>), MEP (Lin<sup>-</sup>Sca-1<sup>-</sup>CD117<sup>+</sup>CD127<sup>-</sup>CD16/32<sup>lo</sup>CD34<sup>+</sup>), MDP (Lin<sup>-</sup>CD11c<sup>+</sup>MHCII<sup>-</sup>CD117<sup>hi</sup>CD115<sup>+</sup>), CDP (Lin<sup>-</sup>CD11c<sup>+</sup>MHCII<sup>-</sup>CD117<sup>lo</sup>CD115<sup>+</sup>), pre-DC (Lin<sup>-</sup>CD11c<sup>+</sup>MHCII<sup>-</sup>CD172a<sup>lo</sup>CD135<sup>+</sup>).

(B & C) Gating strategy for myeloid and lymphoid cell populations of bone marrow cells. (D) Representative FACS plots showing bone marrow cells stained for p53 or the isotype control from mice treated with Ctrl or BTZ, gated on CD4<sup>+</sup> and CD8<sup>+</sup> T cells, Ly6C<sup>hi</sup>, and Ly6C<sup>lo</sup> monocytes (mono), and neutrophils (Neu).

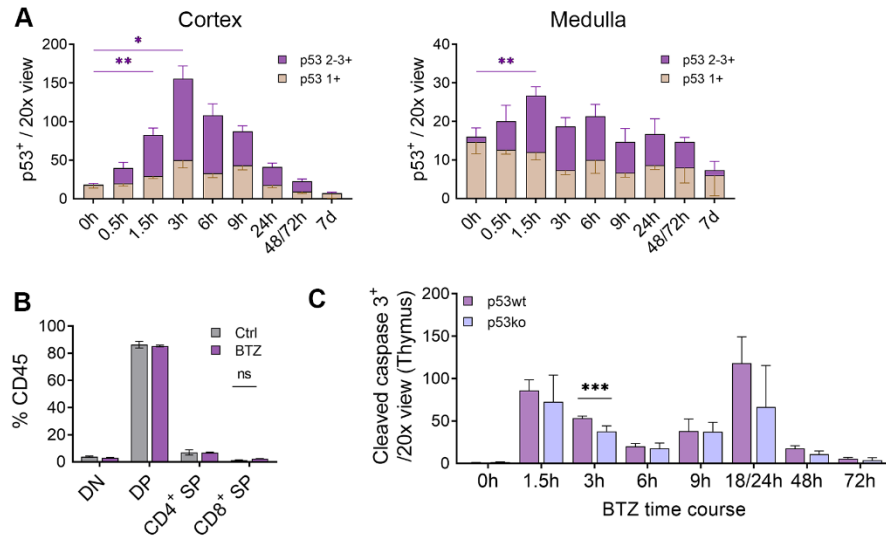

**SI Appendix, Fig. S2. Quantification of the frequency p53<sup>+</sup> subsets and cleaved caspase 3 induction in response to bortezomib.** (A) Quantification of p53<sup>+</sup> frequencies at various time points in the cortex and medulla of the thymus from mice treated with vehicle (BTZ 0h) or BTZ. Moderate and strong p53 staining signals are classified as p53 2-3+ (in purple), mild p53 staining signals are classified as p53 1+ (in light brown). (B) Quantification of the frequency of various T cell types in CD45<sup>+</sup> cell populations in the thymus. (C) Quantification of the expression of cleaved caspase 3 detected by IHC in the thymus of p53wt and p53ko mice at indicated time points post vehicle (BTZ 0h) or 3 mg/kg BTZ treatment (n = 3-4). The indicated *p* values were calculated by multiple unpaired t-tests using Prism. \*, *P* < 0.05; \*\*, *P* < 0.001, \*\*\*, *P* < 0.0001; ns, no significance. Error bars, mean (SEM) for each group.

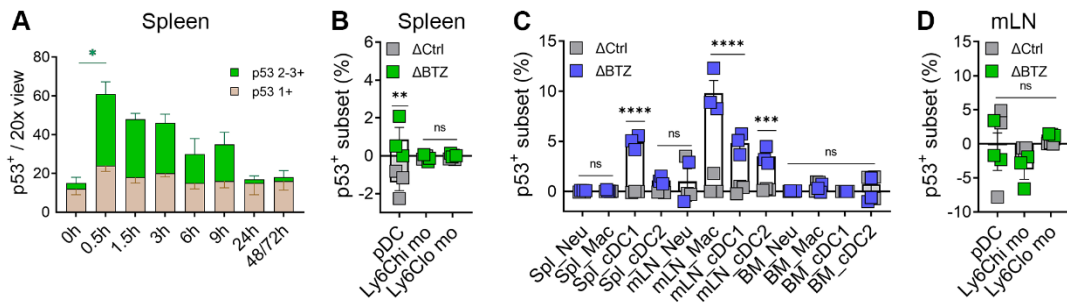

**SI Appendix, Fig. S3. Stabilization of p53 in the spleen and mesenteric lymph node (mLN) by bortezomib.** (A) Quantification of p53<sup>+</sup> frequencies at various time points in the spleen from mice treated with vehicle (BTZ 0h) or BTZ. Moderate and strong p53 staining signals are classified as p53 2-3+ (in green), mild p53 staining signals are classified as p53 1+ (in light brown). (B) Quantification of p53<sup>+</sup> subsets of the indicated splenic cells from mice treated with Ctrl (in grey) or BTZ (in green). (C) Comparison of the frequencies of p53<sup>+</sup> subsets in lymphoid and myeloid cells in the spleen, mLN, and bone marrow from mice treated with vehicle (in grey) or BTZ (in blue). (D) Quantification of p53<sup>+</sup> subsets of the indicated mLN cells from mice treated with vehicle (in grey) or BTZ (in green) (n = 3-4). The indicated *p* values were calculated by multiple unpaired t-tests of using Prism \*, *P* < 0.05; \*\*, *P* < 0.001; \*\*\*, *P* < 0.0001; \*\*\*\*, *P* < 0.00001; ns, no significance. Error bars, mean (SEM) for each group.

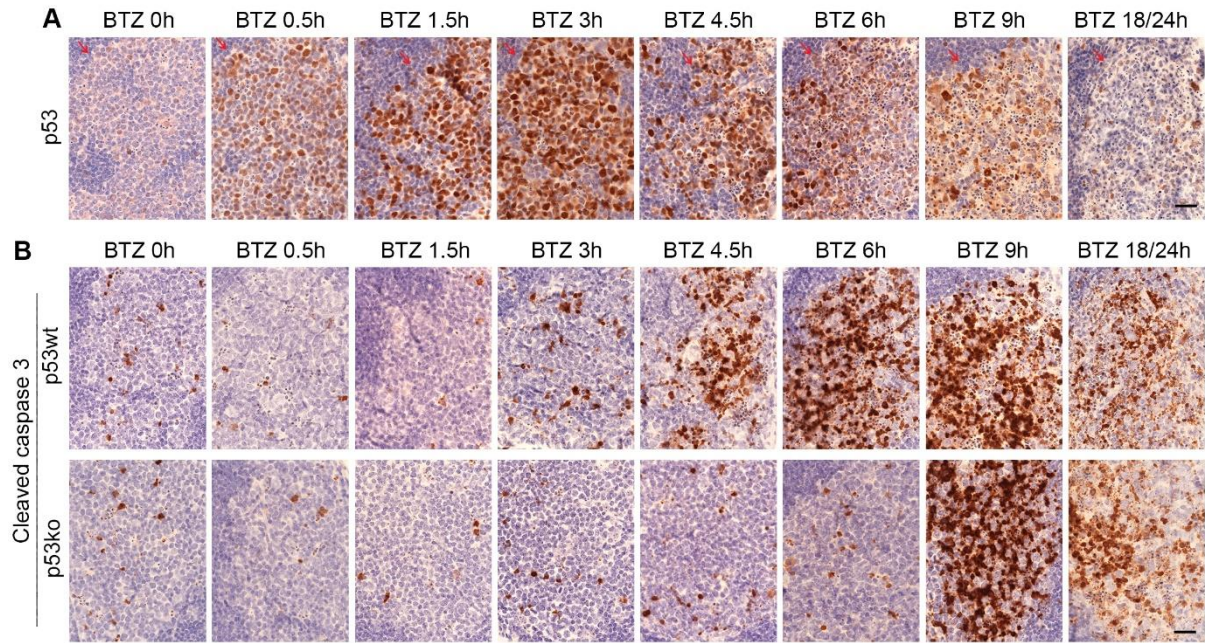

**SI Appendix, Fig. S4. Stabilization of p53 in Peyer's patch by bortezomib.** (A) IHC analysis of p53 levels in the Peyer's patch from mice at indicated time points post vehicle or 3 mg/kg of BTZ treatment (n=3-4). Red arrows point to the germinal centre. (B) IHC analysis and quantification of the expression of cleaved caspase 3 in the bone marrow of p53wt and p53ko mice at indicated time points post vehicle (BTZ 0h) or 3 mg/kg BTZ treatment (n = 3-4). (Scale bars, 20  $\mu$ m.)

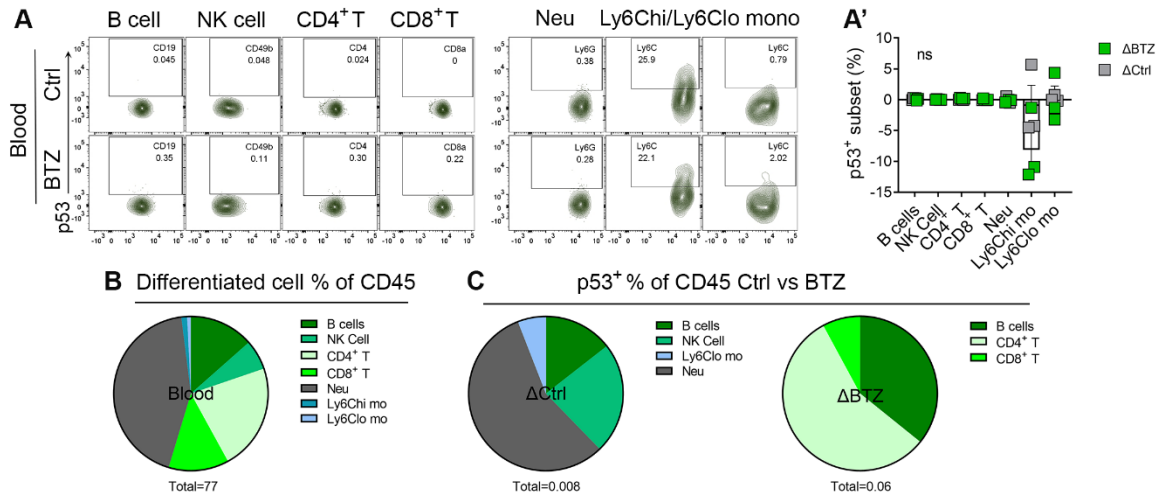

**SI Appendix, Fig. S5. Less p53 stabilization in the blood by bortezomib.** (A) Representative FACS plots showing blood cells stained for p53 from mice treated with Ctrl or BTZ for 1.5h, gated on matured lymphoid and myeloid cells. (A') Quantification of p53<sup>+</sup> frequencies of indicated mature cells in the blood from mice treated with vehicle (in grey) or BTZ (in green). (B) Quantification of frequencies of various CD45<sup>+</sup> blood cells from mice treated with vehicle. 77% of the total CD45<sup>+</sup> population was analyzed. (C) Quantification of frequencies of p53<sup>+</sup> subsets in CD45<sup>+</sup> Blood cells from mice treated with Ctrl and BTZ. ΔCtrl and ΔBTZ were calculated to remove non-specific staining ( $\Delta = \text{p53}^+$  frequency - isotype<sup>+</sup> frequencies) (n = 3-4). The indicated P values were calculated using multiple unpaired t-tests in Prism ns, no significance. Error bars, mean (SEM) for each group.

**SI Appendix, Table S1.** Staining panels for immune profiling

|             | <b>Bone marrow only</b>                                     | <b>Bone marrow<br/>/Thymus/Spleen/Blood<br/>/Lymph node</b> |                          | <b>Thymus</b>               |
|-------------|-------------------------------------------------------------|-------------------------------------------------------------|--------------------------|-----------------------------|
|             | <b>Panel 1</b>                                              | <b>Panel 2</b>                                              | <b>Panel 3</b>           | <b>Panel 3<br/>Modified</b> |
|             | <b>LMPP, CMP, CLP, GMP,<br/>MDP, CDP, pre-cDC</b>           | <b>cDC/pDC/mono/<br/>mac/neu</b>                            | <b>T/B/mac</b>           | <b>T/DN</b>                 |
| DAPI        | fixable viability dye                                       | fixable viability dye                                       | fixable<br>viability dye | fixable viability<br>dye    |
| FITC        | CD172a                                                      | CD8a                                                        | CD8a                     | CD8a                        |
| PE          | CD115                                                       | CD103                                                       | CD4                      | CD4                         |
| PerCP       | CD16/32                                                     | SiglecH                                                     | CD3e                     | CD3e                        |
| PE-Cy7      | CD135- <b>bio</b>                                           | CD11c                                                       | -                        | CD44                        |
| APC         | <b>p53/iso</b>                                              | <b>p53/iso</b>                                              | <b>p53/iso</b>           | <b>p53/iso</b>              |
| APC-Cy7     | Ly6C                                                        | Ly6C                                                        | -                        | CD25                        |
| AF700       | MHCII                                                       | MHCII                                                       |                          |                             |
| Qdot605     | Sca-1                                                       | F4/80                                                       |                          |                             |
| Qdot655     | CD11c                                                       | CD11b                                                       | CD11b                    | CD11b                       |
| TxRed       | CD117                                                       | B220                                                        | CD19                     | CD19                        |
| PacificBlue | CD34                                                        | Ly6G                                                        | Ly6G                     | Ly6G                        |
| BUV395      | CD45                                                        | CD45                                                        | CD45                     | CD45                        |
| BV711       | CD127                                                       | CD64                                                        | CD64                     | CD64                        |
| BV786       | -                                                           | -                                                           | -                        | -                           |
| BV510       | <b>LIN<sup>+</sup>CD11b<sup>+</sup>B220<sup>+</sup>CD90</b> | <b>CD3/CD19/CD49b</b>                                       | CD49b                    | CD49b                       |

Abbreviations: mono: monocyte; mac: macrophage; neu: neutrophil; DN double negative.

**SI Appendix, Table S2.** Actual percentage of cell subsets and p53<sup>+</sup> cells in the bone marrow

| <b>18 cell types</b>     | <b>Cell subset % in Ctrl</b> | <b>ΔCtrl p53<sup>+</sup>%</b> | <b>ΔBTZ p53<sup>+</sup>%</b> |
|--------------------------|------------------------------|-------------------------------|------------------------------|
| <b>HSC</b>               | 0.0430                       | 0.00009                       | 0.00274                      |
| <b>MPP</b>               | 0.0190                       | -0.00008                      | 0.00221                      |
| <b>LMPP</b>              | 0.0163                       | -0.00005                      | 0.00110                      |
| <b>CLP</b>               | 0.0327                       | -0.00009                      | 0.00239                      |
| <b>GMP</b>               | 0.0947                       | -0.00005                      | 0.02137                      |
| <b>CMP</b>               | 0.2533                       | 0.00029                       | 0.07823                      |
| <b>MEP</b>               | 0.6933                       | 0.00060                       | 0.34312                      |
| <b>MDP</b>               | 0.0095                       | -0.00002                      | 0.00413                      |
| <b>CDP</b>               | 0.0293                       | 0.00000                       | 0.00747                      |
| <b>Pre-DC</b>            | 0.1933                       | -0.00057                      | -0.00083                     |
| <b>cDC</b>               | 0.0980                       | 0.00043                       | -0.00009                     |
| <b>pDC</b>               | 0.9400                       | 0.00100                       | -0.00175                     |
| <b>Mono</b>              | 11.1333                      | 0.00137                       | 0.00563                      |
| <b>Neu</b>               | 33.9667                      | -0.00014                      | 0.01474                      |
| <b>B cell</b>            | 24.2333                      | -0.00333                      | 0.24700                      |
| <b>NK cell</b>           | 1.8300                       | -0.00018                      | 0.11205                      |
| <b>CD4<sup>+</sup> T</b> | 0.3800                       | -0.00012                      | 0.00103                      |
| <b>CD8<sup>+</sup> T</b> | 1.0300                       | -0.00065                      | 0.00268                      |

Abbreviations: mono: monocyte; neu: neutrophil; DN double negative; Ctrl: control; BTZ: bortezomib.



**SI Appendix, Table S3.** Actual percentage of cell subsets and p53<sup>+</sup> cells in the spleen

| <b>Spleen</b>                 | <b>Cell subset % in Ctrl</b> | <b><math>\Delta</math>Ctrl p53<sup>+</sup>%</b> | <b><math>\Delta</math>BTZ p53<sup>+</sup>%</b> |
|-------------------------------|------------------------------|-------------------------------------------------|------------------------------------------------|
| <b>B cell</b>                 | 62.2333                      | -0.01300                                        | 0.49200                                        |
| <b>NK Cell</b>                | 2.0433                       | 0.00075                                         | 0.01804                                        |
| <b>CD4<sup>+</sup> T cell</b> | 10.5900                      | 0.00227                                         | 0.12471                                        |
| <b>CD8<sup>+</sup> T cell</b> | 7.2100                       | 0.00152                                         | 0.08469                                        |
| <b>Neu</b>                    | 2.3733                       | -0.00157                                        | 0.00152                                        |
| <b>Mac</b>                    | 0.2833                       | -0.00004                                        | 0.00016                                        |
| <b>pDC</b>                    | 0.4133                       | -0.00720                                        | -0.00067                                       |
| <b>cDC1</b>                   | 0.2867                       | -0.00014                                        | 0.01193                                        |
| <b>cDC2</b>                   | 0.7167                       | -0.00072                                        | 0.00665                                        |
| <b>Ly6Chi mono</b>            | 0.4567                       | -0.00070                                        | -0.00092                                       |
| <b>Ly6Clo mono</b>            | 0.4967                       | -0.00060                                        | 0.00006                                        |

Abbreviations: neu: neutrophil; mac: macrophage; mono: monocyte; Ctrl: control; BTZ: bortezomib.

**SI Appendix, Table S4.** Actual percentage of cell subsets and p53<sup>+</sup> cells in the lymph node

| <b>Lymph node</b>        | <b>Cell subset % in Ctrl</b> | <b>ΔCtrl p53<sup>+</sup>%</b> | <b>ΔBTZ p53<sup>+</sup>%</b> |
|--------------------------|------------------------------|-------------------------------|------------------------------|
| <b>B cells</b>           | 47.7000                      | 0.00431                       | 0.39433                      |
| <b>NK Cell</b>           | 0.4167                       | 0.00046                       | 0.01304                      |
| <b>CD4<sup>+</sup> T</b> | 21.7000                      | 0.00819                       | 0.39065                      |
| <b>CD8<sup>+</sup> T</b> | 16.4333                      | 0.00439                       | 0.30526                      |
| <b>Neu</b>               | 0.0230                       | 0.00055                       | 0.00028                      |
| <b>Mac</b>               | 0.0089                       | 0.00006                       | 0.00071                      |
| <b>pDC</b>               | 0.1173                       | 0.00678                       | 0.00500                      |
| <b>cDC1</b>              | 0.1493                       | 0.00055                       | 0.00462                      |
| <b>cDC2</b>              | 0.4767                       | 0.00110                       | 0.01457                      |
| <b>Ly6Chi mono</b>       | 0.1253                       | 0.00367                       | 0.00000                      |
| <b>Ly6Clo mono</b>       | 0.2633                       | 0.00033                       | 0.00329                      |

Abbreviations: neu: neutrophil; mac: macrophage; mono: monocyte; Ctrl: control; BTZ: bortezomib.

**SI Appendix, Table S5.** Reagents and Antibodies for IHC

| <b>Antibodies for IHC</b>             | <b>Company</b>           | <b>Cat No.</b> |
|---------------------------------------|--------------------------|----------------|
| p53 antibody (Rabbit anti-mouse)      | Home-made (p53Lab)       | N/A            |
| p21antibody                           | Santa Cruz               | sc-6246        |
| Puma antibody                         | Cell Signaling           | #4976          |
| Cleaved caspase 3 antibody            | Cell Signaling           | #9661          |
|                                       |                          |                |
| <b>Reagents</b>                       | <b>Company</b>           | <b>Cat No.</b> |
| Bovine serum albumin                  | Sigma-Aldrich            | A2058 or A7906 |
| collagenase IV                        | Sigma-Aldrich            | C5138          |
| non-sterile mouse serum               | Sigma-Aldrich            | M5905          |
| non-sterile rat serum                 | Sigma-Aldrich            | R9759          |
| DAPI                                  | Biologend                | D1306          |
| AbC total compensation capture beads  | Biologend                | A10497         |
| fixable viability Dye eFluor 455 (UV) | Biologend                | 65-0868-14     |
| Fix/Perm concentrate                  | Biologend                | 00-5123-43     |
| Fix/Perm diluent reagent              | Biologend                | 00-5223-56     |
| DNaseI                                | Roche                    | 10104159001    |
| RBC Lysis Buffer                      | Roche                    | 11814389001    |
| TRIzol reagent                        | Ambion Life Technologies | 15596018       |

**SI Appendix, Table S6.** Antibody list for flow cytometry

| <b>Antibodies for FACS</b> | <b>Clone</b> | <b>Conjugate/ Fluorochrome</b> | <b>Company</b> | <b>Catalog No.</b> |
|----------------------------|--------------|--------------------------------|----------------|--------------------|
| anti-mouse CD45            | 30-F11       | BUV395                         | BD Bioscience  | 564279             |
| anti-mouse CD49b           | HMa2         | BV510                          | BD Bioscience  | 740133             |
| anti-mouse CD49b           | HMa2         | FITC                           | Biologend      | 103503             |
| anti-mouse CD3             | 17A2         | FITC                           | eBioscience    | 11-0032-82         |
| anti-mouse Ly-6G/Ly-6C     | RB68C5       | FITC                           | Biologend      | 108405             |
| anti-mouse CD19            | 1D3/CD19     | FITC                           | Biologend      | 152404             |
| anti-mouse B220            | RA3-6B2      | FITC                           | Biologend      | 103205             |
| anti-mouse CD150           | TC15-12F12.2 | PE                             | Biologend      | 115903             |
| anti-mouse CD115           | AFS98        | PerCP-eFluor 710               | eBioscience    | 46-1152-80         |
| anti-mouse CD135           | A2F10        | Biotin                         | eBioscience    | 13-1351-85         |
| anti-mouse CD16/32         | 93           | APC-Cy7                        | Biologend      | 101328             |
| anti-mouse Sca-1/Ly6A/E    | D7           | BV785                          | Biologend      | 108139             |
| anti-mouse CD48            | HM48-1       | BV510                          | Biologend      | 103443             |
| anti-mouse CD11b           | M1/70        | FITC                           | Biologend      | 101205             |
| anti-mouse CD135           | A2F10        | PE                             | eBioscience    | 12-1351-82         |
| anti-mouse CD43            | eBioR2/60    | Biotin                         | eBioscience    | 13-0431-85         |
| anti-mouse B220            | RA3-6B2      | APC-Cy7                        | Biologend      | 103224             |
| anti-mouse CD24            | M1/69        | BV605                          | Biologend      | 101827             |
| anti-mouse CD19            | eBio1D3      | eFluor 450                     | eBioscience    | 48-0193-82         |
| anti-mouse CD127           | A7R34        | Brilliant Violet 711           | Biologend      | 135035             |
| anti-mouse CD3             | 17A2         | Brilliant Violet 786           | BD Bioscience  | 564010             |
| anti-mouse CD8a            | 53-6.7       | FITC                           | Biologend      | 100705             |
| anti-mouse CD4             | RM4-5        | PE                             | Biologend      | 100511             |
| anti-mouse CD3e            | 145-2C11     | PerCP-Cy5.5                    | Biologend      | 100327             |
| anti-mouse/human CD44      | IM7          | PE-Cy7                         | Biologend      | 103029             |
| anti-mouse CD25            | PC61         | APC-Cy7                        | Biologend      | 102025             |
| anti-mouse CD117           | 2B8          | PE-CF594                       | BD Bioscience  | 562417             |
| anti-mouse CD34            | SA376A4      | BV421                          | Biologend      | 152207             |
| anti-mouse CD19            | 1D3          | BV510                          | BD Bioscience  | 562956             |
| anti-mouse Ly-6G           | 1A8          | BV510                          | Biologend      | 127633             |
| anti-mouse CD11b           | M1/70        | BV510                          | Biologend      | 101245             |
| Streptavidin               |              | PE-Cy7                         | Biologend      | 405206             |
| anti-mouse CD172           | P84          | FITC                           | Biologend      | 144005             |
| anti-mouse NK1.1           | PK136        | FITC                           | eBioscience    | 11-5941-85         |
| anti-mouse CD115           | AFS98        | Alexa 488                      | eBioscience    | 53-1152-80         |
| anti-mouse CD127           | A7R34        | FITC                           | eBioscience    | 11-1271-82         |
| anti-mouse CD3e            | 145-2C11     | FITC                           | eBioscience    | 11-0031-82         |
| anti-mouse SiglecH         | 551          | PerCP-Cy5.5                    | Biologend      | 129613             |

|                                 |             |                      |               |            |
|---------------------------------|-------------|----------------------|---------------|------------|
| anti-mouse CD115                | AFS98       | PerCP-eFluor 710     | eBioscience   | 46-1152-80 |
| anti-mouse B220                 | RA3-6B2     | PerCP-Cy5.5          | BD Bioscience | 552771     |
| anti-mouse Ly-6C                | HK1.4       | PerCP-Cy5.5          | eBioscience   | 45-5932-82 |
| anti-mouse Siglech              | 551         | PerCP-Cy5.5          | Biologend     | 129613     |
| anti-mouse CD117                | 2B8         | PerCP-Cy5.5          | Biologend     | 105824     |
| anti-mouse Ly-6G                | RB6-8C5     | PerCP-Cy5.5          | eBioscience   | 45-5931-80 |
| anti-mouse Ly-6C                | HK1.4       | PerCP-Cy5.5          | eBioscience   | 45-5932-82 |
| anti-mouse CD16/32              | 93          | PerCP-Cy5.5          | eBioscience   | 45-0161-80 |
| anti-mouse CD19                 | eBio1D3     | PE                   | eBioscience   | 12-0193-83 |
| anti-mouse CD133                | 13A4        | PE                   | eBioscience   | 12-1331-82 |
| anti-mouse CD45                 | 30-F11      | PE                   | Biologend     | 103106     |
| anti-mouse CD115                | AFS98       | PE                   | eBioscience   | 12-1152-81 |
| anti-mouse F4/80                | BM8         | PE                   | Biologend     | 123110     |
| anti-mouse MHC Class II I-A/I-E | M5/114.15.2 | PE                   | eBioscience   | 12-5321-81 |
| anti-mouse CD103                | 2E7         | PE                   | Biologend     | 121405     |
| anti-mouse CD19                 | 1D3         | PECF594              | BD Bioscience | 562291     |
| anti-mouse B220                 | RA3-6B2     | PE-Dazzle 594        | Biologend     | 103257     |
| anti-mouse CD127                | 5B/199      | PE-CF594             | BD Bioscience | 562419     |
| anti-mouse B220                 | RA3-6B2     | PE-CF594             | BD Bioscience | 562313     |
| anti-mouse Ly-6C                | HK1.4       | PE-Cy7               | eBioscience   | 25-5932-82 |
| anti-mouse Ly-6C                | HK1.4       | PE-Cy7               | eBioscience   | 25-5932-82 |
| anti-mouse CD11c                | N418        | PE-Cy7               | eBioscience   | 25-0014-82 |
| anti-mouse CD34                 | RAM34       | eFluor 450           | eBioscience   | 48-0341-82 |
| anti-mouse Sca-1/Ly6A/E         | D7          | Brilliant Violet 605 | Biologend     | 108133     |
| anti-mouse F4/80                | BM8         | Brilliant Violet 605 | Biologend     | 123133     |
| anti-mouse Ly-6G                | 1A8         | Pacific Blue         | Biologend     | 127611     |
| anti-mouse CD11c                | N418        | Brilliant Violet 650 | Biologend     | 117339     |
| anti-mouse CD11b                | M1/70       | Brilliant Violet 650 | Biologend     | 101259     |
| anti-mouse CD11c                | N418        | Brilliant Violet 605 | Biologend     | 117333     |
| anti-mouse CD11b                | M1/70       | Brilliant Violet 650 | Biologend     | 101239     |
| Streptavidin                    |             | Brilliant Violet 711 | Biologend     | 405241     |
| anti-mouse CD64                 | 10.1        | Brilliant Violet 711 | Biologend     | 305041     |
| anti-mouse CD3e                 | 145-2C11    | BV510                | BD Bioscience | 563024     |
| anti-mouse B220                 | RA3-6B2     | BV510                | BD Bioscience | 563103     |
| anti-mouse CD90.2               | 53-2.1      | BV510                | BD Bioscience | 740102     |
| anti-mouse MHC Class II I-A/I-E | M5/114.15.2 | Alexa Fluor 700      | eBioscience   | 56-5321-82 |
| anti-mouse CD45                 | 30-F11      | Alexa Fluor 700      | Biologend     | 103128     |
| anti-mouse Sca-1/Ly6A/E         | D7          | Alexa Fluor 700      | Biologend     | 108142     |
| anti-mouse Sca-1/Ly6A/E         | D7          | Alexa Fluor 647      | Biologend     | 108118     |
| anti-mouse CD34                 | SA376A4     | Alexa Fluor 647      | Biologend     | 152205     |
| anti-mouse CD49b                | DX5         | APC-Cy7              | Biologend     | 108919     |

|                         |             |                      |                |            |
|-------------------------|-------------|----------------------|----------------|------------|
| anti-mouse CD45         | 30-F11      | APC-Cy7              | BD Bioscience  | 557659     |
| anti-mouse Ly-6C        | HK1.4       | APC-Cy7              | Biolegend      | 128026     |
| anti-mouse CD16/32      | 93          | APC-Cy7              | Biolegend      | 101328     |
| anti-mouse CD25         | M-A251      | Brilliant Violet 786 | BD Bioscience  | 563700     |
| anti-mouse CD45         | 30-F11      | APC-Cy7              | BD Bioscience  | 557659     |
| anti-mouse Sca-1/Ly6A/E | D7          | APC-Fire 750         | Biolegend      | 108145     |
| anti-mouse B220         | RA3-6B2     | APC-eFluor 780       | eBioscience    | 47-0452-82 |
| anti-mouse CD45         | 30-F11      | APC-Cy7              | BD Bioscience  | 557659     |
| anti-mouse CD135        | A2F10       | Biotin               | eBioscience    | 13-1351-82 |
| anti-mouse CD8a         | 53-6.7      | APC                  | Biolegend      | 100711     |
| anti-mouse p53          | 1C12 (IgG1) | Alexa 647            | Cell Signaling | #2533      |
| anti-mouse IgG1         | MOPC-21     | Alexa 647            | Cell Signaling | #4843      |

**SI Appendix, Table S7.** qPCR primers

|                  |                         |
|------------------|-------------------------|
| <i>Cdkn1a-F</i>  | GTCTTGCACTCTGGTGTCTG    |
| <i>Cdkn1a-R</i>  | GATAGAAATCTGTCAGGCTGGTC |
| <i>Bbc3-F</i>    | AGCAGCACTTAGAGTCGCC     |
| <i>Bbc3-R</i>    | CGCTCGTACTGCGCGTTG      |
| <i>Gadd45a-F</i> | AGCAGAAGACCGAAAGGATG    |
| <i>Gadd45a-R</i> | CAGGCACAGTACCACGTTAT    |
| <i>Trp53-F</i>   | GTTATGTGCACGTACTCTCCTC  |
| <i>Trp53-R</i>   | CGTCATGTGCTGTGACTTCT    |
| <i>Ccna2-F</i>   | TCAAGACTCGACGGGTTGC     |
| <i>Ccna2-R</i>   | GTGAAGGCAGGCTGTTTACT    |
